# Supplementary material
Source: publisher site journal article supplement (https://static.cambridge.org/content/id/urn:cambridge.org:id:article:S0016756818000924/resource/name/S0016756818000924supp001.xls)
Supplement: Supplementary file 1 [file S0016756818000924supp001.xls]

## Sheet: Foglio1
Supplementary Table S1. Stepwise 40Ar/39Ar data
BR3 WR (Barda granophyre, whole-rock)
Temp.°C	36Ar/39Ar	40Ar/39Ar	App.Age(Ma)	39Ar%	40Ar*%	37Ar/39Ar	40Ar/36Ar
	(±2σ)	(±2σ)	(±2σ)			(±2σ)	(±2σ)
400	1.93708	573.168	0.7	0.35	0.14	0.216	295.9
	0.13729	40.013	49.3 (49.3)			0.0082	41.7
450	9.14641	2709.41	5.8	0.51	0.25	0.2167	296.2
	0.08015	23.314	28.7 (28.7)			0.009	5.1
500	13.1631	3889.91	0.2	0.58	0.01	0.3165	295.5
	0.23293	69.397	84.6 (84.6)			0.0059	10.1
550	2.64834	802.137	16.9	1.93	2.44	0.2207	302.9
	0.17786	53.044	64.0 (64.0)			0.0047	34.4
600	1.39935	427.555	12.13	2.54	3.29	0.1885	305.6
	0.0142	4.217	5.11 (5.11)			0.0021	5.7
650	1.26914	424.437	42.26	3.15	11.64	0.1139	334.4
	0.00492	2.122	2.17 (2.19)			0.001	2.5
700	1.2229	442.326	68.72	6.15	18.3	0.0407	361.7
	0.00609	2.266	2.41 (2.43)			0.0007	4.3
750	0.59544	257.157	68.92	10.32	31.58	0.0327	431.9
	0.00132	1.286	1.12 (1.17)			0.0002	2.7
800	0.05991	98.855	68.88	6.83	82.1	0.0445	1650.5
	0.00021	0.494	0.41 (0.54)			0.0008	11.5
850	0.07213	101.507	68.09	10.34	79.01	0.0642	1407.8
	0.00039	0.542	0.46 (0.57)			0.0007	14.6
900	0.1317	119.323	68.26	8.52	67.39	0.0701	906.2
	0.00033	0.597	0.50 (0.61)			0.0011	5.7
950	0.22465	146.967	68.41	7.66	54.83	0.063	654.2
	0.00129	0.881	0.80 (0.87)			0.0006	7.6
1000	0.28913	166.325	68.67	7.71	48.64	0.087	575.3
	0.00128	0.832	0.76 (0.83)			0.0006	5.7
1050	0.34291	181.996	68.53	14.15	44.34	0.3011	530.9
	0.00131	0.91	0.82 (0.89)			0.0006	4.2
1100	0.41128	202.458	68.7	12.41	39.98	0.0885	492.3
	0.00094	1.012	0.87 (0.94)			0.0006	3
1150	0.40533	200.507	68.56	3.94	40.27	0.1745	494.8
	0.00587	2.771	2.72 (2.75)			0.0007	13.3
1200	0.67349	279.634	68.48	1.38	28.84	0.269	415.3
	0.01285	5.252	5.40 (5.41)			0.0049	20.2
1250	1.32777	407.965	13.5	0.39	3.83	0.2289	307.3
	0.07268	22.264	26.6 (26.6)			0.0091	31.7
1300	1.76901	553.696	26.6	0.49	5.59	0.2047	313
	0.03491	11.09	12.9 (12.9)			0.0064	12.9
1350	2.26417	711.099	36.1	0.64	5.92	0.3929	314.1
	0.15399	48.76	56.6 (56.6)			0.016	56.2
TOTAL	0.60871	254.895	63.78	100	29.44	0.118	418.8
	0.00394	1.212	1.40 (1.44)			0.0003	3.5
Argon isotopic composition (corrected for blank, mass discrimination and interference),
Apparent Age and percentage of nucleogenic and radiogenic argon for sample BR3 WR.
Errors on age are without and (with) error on J respectively. Errors quoted are 2σ. J=0.000480± 0.000002
BR5 WR (Barda granophyre, whole-rock)
Temp.°C	36Ar/39Ar	40Ar/39Ar	App.Age(Ma)	39Ar%	40Ar*%	37Ar/39Ar	40Ar/36Ar
	(±2σ)	(±2σ)	(±2σ)			(±2σ)	(±2σ)
450	1.7277	512.202	1.5	0.85	0.33	0.3184	296.5
	0.17318	50.994	63.8 (63.8)			0.0095	47.5
500	4.87395	1445.39	4.6	1.14	0.36	0.3266	296.6
	0.257	75.698	94.5 (94.5)			0.0091	27.8
550	1.4619	433.514	1.4	3.02	0.36	0.2954	296.6
	0.07088	20.998	26.2 (26.2)			0.0045	24
600	1.4176	444.662	22.65	1.86	5.8	0.242	313.7
	0.02489	8.379	9.73 (9.73)			0.0044	12.6
650	0.32891	143.72	40.66	3.93	32.38	0.1189	437
	0.00743	3.38	3.48 (3.49)			0.0029	21.1
700	0.1048	97.944	58.23	7.93	68.39	0.0554	934.8
	0.0007	0.767	0.68 (0.74)			0.0019	14.1
750	0.0405	92.281	69.6	9.53	87.04	0.0695	2280.5
	0.00049	1.176	1.01 (1.06)			0.0022	60.8
800	0.03122	89.601	69.65	10.4	89.71	0.034	2871.5
	0.00017	0.448	0.38 (0.52)			0.0009	28
850	0.05693	97.326	69.76	6.64	82.72	0.0309	1710
	0.00015	0.487	0.42 (0.54)			0.0002	11.3
900	0.10229	111.01	70	5.36	72.78	0.04	1085.4
	0.00024	0.555	0.48 (0.59)			0.0006	7
950	0.14671	124.07	69.94	5.34	65.06	0.0298	845.7
	0.00037	0.62	0.54 (0.64)			0.0006	5.3
1000	0.14362	123.147	69.93	5.93	65.54	0.0211	857.5
	0.00058	0.616	0.54 (0.65)			0.0005	6.9
1050	0.10523	111.967	70.07	9.46	72.23	0.0215	1064.1
	0.00034	0.56	0.48 (0.6)			0.0004	7.8
1100	0.12606	118.035	69.99	11.75	68.44	0.0262	936.3
	0.00031	0.59	0.51 (0.62)			0.0003	5.8
1150	0.14277	123.149	70.14	12.54	65.74	0.0255	862.6
	0.00046	0.616	0.54 (0.64)			0.0004	6.2
1200	0.30066	169.755	70.11	2.44	47.67	0.0793	564.7
	0.00078	0.849	0.75 (0.83)			0.0008	3.6
1250	0.59624	256.859	69.92	0.86	31.41	0.1395	430.8
	0.0044	1.866	1.93 (1.96)			0.0042	6.6
1350	0.96245	365.129	69.96	1.03	22.11	0.1111	379.4
	0.02258	8.398	9.12 (9.12)			0.0021	18.7
TOTAL	0.25983	150.089	63.64	100	48.85	0.0587	577.7
	0.00397	1.194	1.43 (1.46)			0.0004	10.1
Argon isotopic composition (corrected for blank, mass discrimination and interference),
Apparent Age and percentage of nucleogenic and radiogenic argon for sample BR5 WR.
Errors on age are without and (with) error on J respectively. Errors quoted are 2σ. J=0.000490±0.000003
BR7 WR (Barda granophyre, whole-rock)
Temp.°C	36Ar/39Ar	40Ar/39Ar	App.Age(Ma)	39Ar%	40Ar*%	37Ar/39Ar	40Ar/36Ar
	(±2σ)	(±2σ)	(±2σ)			(±2σ)	(±2σ)
450	1.9857	589.91	2.78	0.66	0.54	0.2779	297.1
	0.02663	7.761	9.71 (9.71)			0.0068	6.9
550	3.32901	984.087	0.4	3.9	0.04	0.2955	295.6
	0.09986	4.92	26.3 (26.3)			0.0054	11.7
600	1.30437	391.399	5.26	4.68	1.53	0.2654	300.1
	0.02303	1.957	6.21 (6.21)			0.0023	7.2
650	1.92083	647.593	69.01	4.15	12.35	0.0555	337.1
	0.02814	3.238	7.55 (7.56)			0.0017	11.6
700	0.80926	319.5	69.32	14.8	25.15	0.0353	394.8
	0.00463	1.598	1.78 (1.81)			0.001	4.3
750	0.40544	199.619	68.85	17.88	39.98	0.0163	492.4
	0.001	0.998	0.88 (0.95)			0.0004	4.1
800	0.09728	108.835	69.09	10.12	73.59	0.0337	1118.9
	0.00034	0.544	0.47 (0.58)			0.0005	11.4
850	0.15576	125.882	68.92	6.74	63.45	0.1775	808.6
	0.00038	0.629	0.54 (0.64)			0.0006	5
900	0.24398	151.804	68.78	6.22	52.52	0.1232	622.3
	0.00056	0.759	0.66 (0.74)			0.0006	3.9
950	0.29127	166.246	69.17	7.2	48.23	0.0583	570.8
	0.00105	0.831	0.75 (0.83)			0.0006	3.9
1000	0.53469	314.206	132.4	4.08	49.72	0.0921	587.7
	0.00727	4.514	4.09 (4.14)			0.0014	16.4
1050	0.48313	294.277	128.67	7.41	51.51	0.5059	609.4
	0.00406	2.635	2.37 (2.46)			0.0045	10.9
1100	0.69858	362.783	132.54	6.57	43.1	0.1759	519.4
	0.01472	8.033	7.46 (7.49)			0.0028	21.9
1150	0.89864	420.724	131.58	3.3	36.89	0.178	468.2
	0.00493	2.336	2.25 (2.34)			0.0021	4.3
1200	1.36373	496.993	80.9	0.41	18.92	0.3224	364.5
	0.06622	2.487	16.6 (16.6)			0.0074	35.8
1250	1.44082	538.686	96.73	0.63	20.97	0.3238	373.9
	0.01447	2.694	4.21 (4.24)			0.0098	7.6
1300	1.52856	564.935	96.99	1.25	20.05	0.2908	369.6
	0.02841	2.825	7.38 (7.4)			0.0035	12.9
TOTAL	0.69954	296.238	77.07	100	30.22	0.1292	423.5
	0.00442	0.723	1.26 (1.32)			0.0005	3.2
Argon isotopic composition (corrected for blank, mass discrimination and interference),
Apparent Age and percentage of nucleogenic and radiogenic argon for sample BR7 WR.
Errors on age are without and (with) error on J respectively. Errors quoted are 2σ. J=0.000490± 0.000003
